# Supplementary material for: Salvia castanea Hairy Roots are More Tolerant to Phosphate Deficiency than Salvia miltiorrhiza Hairy Roots Based on the Secondary Metabolism and Antioxidant Defenses
Source: PubMed Central journal article supplement (PMC6099837; doi:10.3390/molecules23051132), 2018-05-10
Supplement: molecules-23-01132-s001.pdf [file molecules-23-01132-s001.pdf]

1 **Supplementary profiles**2 **Table S1. Primers used for RT-qPCR**

| <b>Gene</b>            | <b>Sense Primer (5'–3')</b> | <b>Reverse Primer (5'–3')</b> |
|------------------------|-----------------------------|-------------------------------|
| <i><b>β-ACTIN</b></i>  | GGTGCCCTGAGGTCCTGTT         | AGGAACCACCGATCCAGACA          |
| <i><b>PAL</b></i>      | GGCGGCGATTGAGAGCAGGA        | ATCAGCAGATAGGAAGAGGAGCACC     |
| <i><b>TAT</b></i>      | TTCAACGGCTACGCTCCAAC        | AAACGGACAATGCTATCTCAAT        |
| <i><b>RAS</b></i>      | CGCCCTAGTTGAGTTCTACCCTTACGC | TCGGATAGGTGGTGCTCGTTTGC       |
| <i><b>CYP98AH4</b></i> | CTAAGGAGGTGCTGAAGGAG        | GTGGAGTCGTTGTAGATGGA          |
| <i><b>DXS1</b></i>     | CGACCAGGTAGTGCACGACG        | TCATCTGAAGGAGCCATCACCAC       |
| <i><b>HMGR</b></i>     | GCAACATCGTCTCCGCCGTCTACA    | GATGGTGGCCAGCAGCCTGGAGTT      |
| <i><b>KSL</b></i>      | CATGTCGAACAAGGACGTA         | AATCATCCAAGGTTAGTGCC          |
| <i><b>CYP76AH1</b></i> | CAGGAGGTGAACGGCTATCT        | GTTATGAACCAGAGTCGCAGTAG       |
| <i><b>SPX1</b></i>     | ATGAGGGTGTGATCAAGGGA        | ACTAATCTGGAGTGGTGGCAAT        |
| <i><b>SPX3</b></i>     | GCCAGACCACCATAGAATCG        | GCGGCGGCAGAGAGAA              |

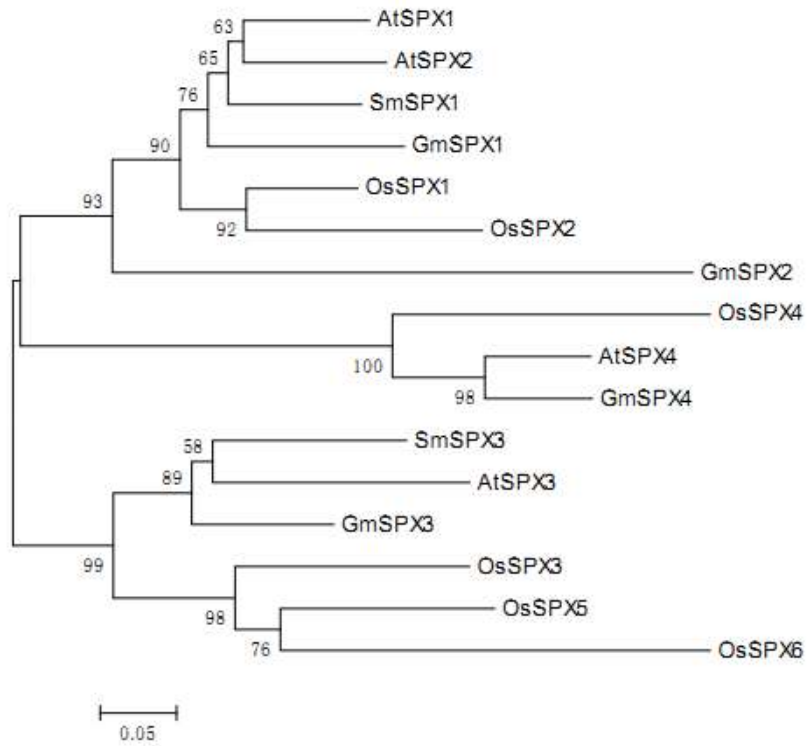

4

5 **Figure S1. Multiple sequence alignment of SmSPX1/3 protein sequences with**  
 6 **AtSPXs, OsSPXs and GmSPXs protein sequences.**

7
